# Supplementary material for: Metal-free covalent organic frameworks containing precise heteroatoms for electrocatalytic oxygen reduction reaction
Source: Royal Society of Chemistry journal article supplement (doi:10.1039/d3ta03534d), 2023-01-01
Supplement: d3ta03534d1.pdf [file d3ta03534d1.pdf]

Electronic Supplementary Material (ESI) for Journal of Materials Chemistry A.  
This journal is © The Royal Society of Chemistry 2023

## Supplementary Information

### **Metal-Free Covalent Organic Frameworks Containing Precise Heteroatoms for Electrocatalytic Oxygen Reduction Reaction**

Jiali Li, Ji Jia, Jinquan Suo, Cuiyan Li, Zhiwei Wang, Hui Li,<sup>\*</sup> Valentin Valtchev, Shilun Qiu,  
Xiaoming Liu,<sup>\*</sup> and Qianrong Fang<sup>\*</sup>

## **Table of Contents**

|                                 |    |
|---------------------------------|----|
| 1. Experimental procedures..... | 3  |
| 2. Results and Discussion ..... | 8  |
| 3. References.....              | 24 |
| 4. Author Contributions .....   | 29 |

# 1. Experimental Procedures

## 1.1 Materials

All starting materials and solvents, unless otherwise noted, were obtained from J&K Scientific LTD. Benzotrithiophene tricarbaldehyde (BTT) was purchased from Jilin Extension Technology. Mesitylene and 1,4-dioxane were obtained from J&K Scientific LTD.

## 1.2 Synthesis and Characterization

### Synthesis of 4,4'-(Benzoselenadiazole-4,7-diyl) diaminobenzene (BSD)

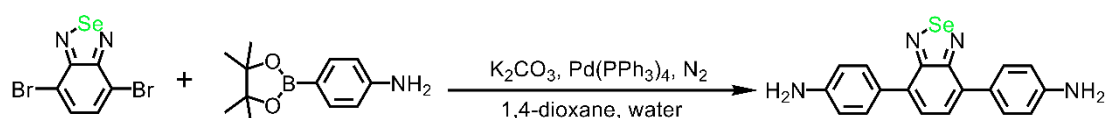

4,7-dibromo-2,1,3-benzoselenadiazole (1.6 g, 4.69 mmol), 4-aminophenylboronic acid pinacol ester (2.26 g, 10.32 mmol),  $K_2CO_3$  (1.94 g, 10.07 mmol) and  $Pd(PPh_3)_4$  (54.52 mg, 0.47 mmol) were added into the mixture solution of 1,4-dioxane (45 mL) and water (15 mL). The mixture was degassed for 30 min and then refluxed under  $N_2$  atmosphere for 3 days. After cooling down to room temperature, the formed precipitate was poured into water and extracted by dichloromethane for three times. After the solvent was evaporated, the crude product was chromatographed on silica gel using DCM/PE=4/1 as an eluent to afford a red solid. Yield: 1.2 g (68%).  $^1H$  NMR (400MHz,  $CHCl_3$ ):  $\delta$  7.76 (d, 4H),  $\delta$  7.56 (s, 2H),  $\delta$  6.87 (d, 4H),  $\delta$  3.86 (s, 4H). FT-IR (KBr,  $cm^{-1}$ ): 3400, 3335, 1610, 1514, 1463, 1358, 1279, 1187, 829, 647, 530.

### Synthesis of 4,4'-(Benzothiadiazole-4,7-diyl) diaminobenzene (BTD)

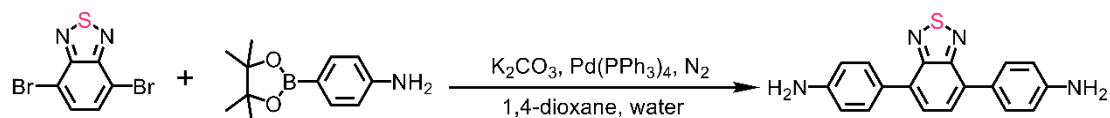

Similar to the synthesis of BSD, 4,7-dibromo-2,1,3-benzothiadiazole (1.4 g, 4.69 mmol), 4-aminophenylboronic acid pinacol ester (2.26 g, 10.32 mmol),  $K_2CO_3$  (1.94 g, 10.07 mmol) and  $Pd(PPh_3)_4$  (54.52 mg, 0.47 mmol) were added into the mixture solution of 1,4-dioxane (45 mL) and water (15 mL). The mixture was degassed for 30 min and then refluxed under  $N_2$  atmosphere for 3 days. After cooling down to room temperature, the formed precipitate was poured into water and extracted by dichloromethane for three times. After the solvent was evaporated, the crude product was chromatographed on silica gel using DCM/PE = 4/1 as an eluent to

afford an orange-red solid.<sup>1</sup> Yield: 926 mg (62%). <sup>1</sup>H NMR (400MHz, CHCl<sub>3</sub>): δ 7.86 (d, 4H), δ 7.72 (s, 2H), δ 6.89 (d, 4H), δ 3.88 (s, 4H). FT-IR (KBr, cm<sup>-1</sup>): 3471, 3371, 1620, 1518, 1478, 1347, 1282, 1370, 1190, 822, 601, 534.

#### Synthesis of 4,4'-(Benzoxadiazole-4,7-diyl) diaminobenzene (BXD)

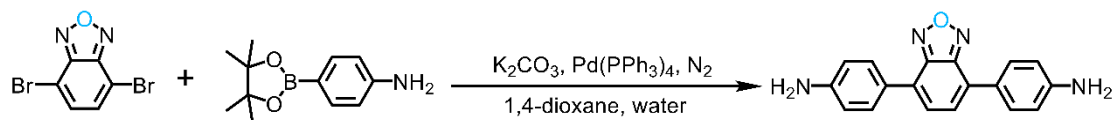

Similar to the synthesis of BSD and BTD, 4,7-dibromo-2,1,3-benzoxadiazole (1.3 g, 4.69 mmol), 4-aminophenylboronic acid pinacol ester (2.26 g, 10.32 mmol), K<sub>2</sub>CO<sub>3</sub> (1.94 g, 14.07 mmol) and Pd(PPh<sub>3</sub>)<sub>4</sub> (54.52 mg, 0.47 mmol) were added into the mixture solution of 1,4-dioxane (45 mL) and water (15 mL). The mixture was degassed for 30 min and then refluxed under N<sub>2</sub> atmosphere for 3 days. After cooling down to room temperature, the formed precipitate was poured into water and extracted by dichloromethane for three times. After the solvent was evaporated, the crude product was chromatographed on silica gel using dichloromethane/petroleum ether = 4/1 (DCM/PE = 4/1) as an eluent to afford a dark red solid. Yield: 922 mg (65%). <sup>1</sup>H NMR (400MHz, CHCl<sub>3</sub>): δ 7.93 (d, 4H), δ 7.57 (s, 2H), δ 6.86 (d, 4H), δ 3.93 (s, 4H). FT-IR (KBr, cm<sup>-1</sup>): 3483, 3387, 1613, 1511, 1436, 1383, 1291, 1186, 828, 603, 537.

#### Synthesis of JUC-616

BTT (0.04 mmol, 13 mg) and BSD (0.06 mmol, 22.0 mg) were weighed into a Pyrex tube (volume: ca. 20.0 mL with a body length of 18.0 cm, neck length of 9 cm) and to the mixture was added mesitylene (0.6 mL), 1,4-dioxane (0.4 mL) and 0.1 mL of aqueous acetic acid (6.0 mol/L). The Pyrex tube was flash frozen in a liquid nitrogen bath, evacuated to an internal pressure of ca. 19.0 mbar and flame-sealed, reducing the total length by ca. 10.0 cm. Upon warming to room temperature, the tube was placed in an oven at 120 °C for four days. As a result, a brown powder was isolated by centrifugation and washed with acetone (3 × 5.0 mL) and the yield is about 90%. Anal. Calcd: C: 61.09; H: 2.54; N: 10.18; S: 11.64; Se: 14.55. Found: C: 61.65; H: 2.24; N: 10.02; S: 11.86; Se: 14.23.

#### Synthesis of JUC-617

Similar to the synthesis of JUC-616, BTT (0.04 mmol, 13 mg) and BTD (0.06 mmol, 19.0 mg) were weighed into a Pyrex tube (volume: ca. 20.0 mL with a body length of 18.0 cm, neck length of 9 cm) and to the mixture

was added mesitylene (0.5 mL), 1,4-dioxane (0.5 mL) and 0.1 mL of aqueous acetic acid (6.0 mol/L). The Pyrex tube was flash frozen in a liquid nitrogen bath, evacuated to an internal pressure of ca. 19.0 mbar and flame-sealed, reducing the total length by ca. 10.0 cm. Upon warming to room temperature, the tube was placed in an oven at 120 °C for three days. As a result, a red powder was isolated by centrifugation and washed with acetone (3 × 5.0 mL), and the yield is about 87%. Anal. Cald: C: 66.93; H: 2.79; N: 11.16; S: 19.12. Found: C: 67.11; H: 2.03; N: 10.98; S: 19.88.

### **Synthesis of JUC-618**

Similar to the synthesis of JUC-616 and JUC-617, BTT (0.04 mmol, 13 mg) and BXD (0.06 mmol, 18.0 mg) were weighted into a Pyrex tube (volume: ca. 20.0 mL with a body length of 18.0 cm, neck length of 9 cm) and to the mixture was added mesitylene (0.1 mL), 1,4-dioxane (0.9 mL) and 0.1 mL of aqueous acetic acid (6.0 mol/L). The Pyrex tube was flash frozen in a liquid nitrogen bath, evacuated to an internal pressure of ca. 19.0 mbar and flame-sealed, reducing the total length by ca. 10.0 cm. Upon warming to room temperature, the tube was placed in an oven at 120 °C for three days. As a result, an orange powder was isolated by centrifugation and washed with acetone (3 × 5.0 mL), and the yield is about 86%. Anal. Cald: C: 69.13; H: 2.88; N: 11.52; S: 13.17; O: 3.30. Found: C: 70.04; H: 2.35; N: 11.03; S: 13.01; O: 3.57.

## **1.3 Experimental Methods**

### **Nuclear magnetic resonance spectroscopy (NMR)**

<sup>1</sup>H NMR spectra were recorded on a Avance III-400 NMR spectrometer, where chemical shifts ( $\delta$  in ppm) were determined with a residual proton of the solvent as standard.

### **UV/Vis spectra**

Solid UV/Vis spectra have been carried out on a Shimadzu Corporation U-4100 Spectrophotometer within the wavelength range 200–800 nm. liquid UV/Vis spectra have been carried out on a Shimadzu Corporation UV-2700 Spectrophotometer within the wavelength range 200–800 nm.

### **Infrared spectra**

The FT-IR spectra (KBr) were obtained using a IFS-66V/S Fourier transform infrared spectrophotometer from Bruker Germany.

### **Field emission scanning electron microscopy**

Field emission scanning electron microscopy was performed on a SU8020 model HITACHI microscope.

### **Transmission electron microscope**

Transmission electron microscopy was performed on a Tecnai G2 S-Twin F20 with an accelerating voltage of 200 kV.

### **Powder X-ray diffraction**

Powder X-ray diffraction data were recorded on a PANalytical BV Empyrean diffractometer by depositing powder on glass substrate, from  $2\theta = 1.5^\circ$  to  $40^\circ$  with  $0.02^\circ$  increment at  $25^\circ\text{C}$ .

### **Thermogravimetric analysis (TGA)**

Thermogravimetric analysis (TGA) was recorded on a SHIMADZU DTG-60 thermal analyzer under  $\text{N}_2$ . The operational range of the instrument was from  $30^\circ\text{C}$  to  $800^\circ\text{C}$  at a heating rate of  $10^\circ\text{C min}^{-1}$  with  $\text{N}_2$  flow rate of  $30\text{ mL min}^{-1}$ .

### **Nitrogen sorption isotherms**

The sorption isotherm for  $\text{N}_2$  was measured by using a Quantachrome Autosorb-IQ analyzer with ultrahigh-purity gas (99.999% purity). To estimate pore size distributions, nonlocal density functional theory (NLDFT) was applied to analyze the  $\text{N}_2$  isotherm based on the model of  $\text{N}_2@77\text{K}$  on carbon with slit pores and the method of non-negative regularization.

### **Electrochemical measurements**

The ORR catalytic activities of prepared three COFs catalysts were measured in 0.1 M KOH solution. An ink of the catalyst was prepared by mixing 5 mg of catalyst powder and 5 mg acetylene black with 225  $\mu\text{L}$  of ethanol, 225  $\mu\text{L}$  of  $\text{H}_2\text{O}$ , and 50  $\mu\text{L}$  5 wt% Nafion solution, and further placed in an ultrasonic bath. 6  $\mu\text{L}$  of the solution was loaded onto the electrode. The RDE measurements were performed in a three-electrode, one-compartment cell at room temperature, equipped with a graphite rod counter electrode and an Ag/AgCl reference electrode. Linear sweep voltammetry (LSV) was performed  $\text{O}_2$ -saturated 0.1 M KOH at a scan rate of  $10\text{ mV s}^{-1}$  under various electrode rotation rates (400, 625, 900, 1025, 1600, 2225 and 2500 rpm, respectively). Cyclic voltammetry (CV) was performed in  $\text{N}_2$ -saturated and  $\text{O}_2$ -saturated 0.1 M KOH at a scan rate of  $50\text{ mV s}^{-1}$ . Preparation of a small amount of catalyst into an ethanol solution for impedance-potential testing in 0.1 mol/L  $\text{Na}_2\text{SO}_4$  to obtain the conductivity values. A solution of the catalyst was prepared by adding 5 mg of catalyst powder into 225  $\mu\text{L}$  of ethanol, 225  $\mu\text{L}$  of  $\text{H}_2\text{O}$ , and 50  $\mu\text{L}$  N-Methylpyrrolidone (NMP) solution of 1.5 wt% Polyvinylidene fluoride (PVDF), and further placed in an ultrasonic bath. 7  $\mu\text{L}$  of the solution was

loaded onto the glassy carbon electrodes. Impedance tests were carried out in a 0.1 mol/L KCl solution containing 5 mmol/L  $[\text{Fe}(\text{CN})_6]^{3-/4-}$  at an open circuit voltage at room temperature. Multi-step chronoamperometric curve was conducted by measuring the current changes of the catalyst at each applied potential (0.3, 0.6 and 0.7 V vs. RHE) using a ring-disk electrode in  $\text{O}_2$ -saturated on a CHI 760 Electrochemical workstation (set to two cycles). Methanol tolerance tests were performed by chronoamperometric measurement at 0.7 V (vs RHE) at a carbon paper with an area of  $1 \times 1 \text{ cm}^2$  (methanol was dropped into the electrolytes at 200 s).

The turnover frequency (TOF) value is calculated according to the following equation:

$$\text{TOF} = (J \times A) / (4 \times F \times n)$$

where J is the current density at a given potential, A is the surface area of the electrode ( $0.0707 \text{ cm}^2$ ), the number of 4 represents 4 electrons/mol of  $\text{O}_2$ , F is the Faraday constant (96485.3 C/mol), and n stands for the number of moles of Se (O or S) atoms in samples.

The Tafel slope was estimated by linear fitting of the polarization curves according to the following Tafel equation:

$$h = b \times \log j + a$$

where j is the current density and b is the Tafel slope.

The electron transfer number (n) and the faradaic efficiency of  $\text{H}_2\text{O}_2$  can be calculated from the following equations:

$$n = 4 \times \frac{I_D}{I_D + I_R/N}$$

$$F_{\text{H}_2\text{O}_2} = \frac{I_R}{N \times I_D} \times 100\%$$

where  $I_D$  is the disk current,  $I_R$  is the ring current, and N is the collection efficiency (0.47).

## Computational Details

All the calculations were performed by using the Vienna Ab initio simulation package (VASP) based on the density functional theory.<sup>2</sup> The generalized gradient approximation with Perdew-Burke-Ernzerhof (PBE) functional was adopted to describe the exchange and correlation potential energy.<sup>3-5</sup> The K-point is generated by the Monkhorst-Pack grid method with  $1 \times 1 \times 1$  for geometry optimization and  $3 \times 3 \times 1$  for electronic structure calculation.<sup>6</sup> The cut-off energy of plane wave basis is set as 450 eV, and the convergence criteria of the total energy and the force on each ion are  $10^{-5}$  eV and  $0.03 \text{ eV}/\text{\AA}$ , respectively.<sup>7</sup> A vacuum slab of  $15 \text{ \AA}$  in the z-direction is used to avoid the interaction between period layers. Multiwfn software package was used to calculate orbital-weighted Fukui functions.<sup>8</sup> Calculation of density of states and differential charges using the

plane wave basis set with an energy cutoff of 500 eV, the projector augmented wave (PAW) pseudopotentials, and the generalized gradient approximation parameterized by Perdew, Burke, and Ernzerhof (GGA-PBE) for exchange-correlation functional.<sup>9, 10</sup> A vacuum space of 20 Å was applied for the vertical direction of COF. The Brillouin zone was sampled by the Gamma point. All the model structures were fully optimized by ionic and electronic degrees of freedom using the convergence criteria of 10<sup>-4</sup> eV for total energy and 10<sup>-2</sup> eV/Å for the forces on each atom.

The ORR in alkaline electrolyte involves four reaction steps proposed by Nørskov *et al*, the four-electron transfer mechanism was considered with each reaction step as follows:<sup>11</sup>

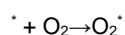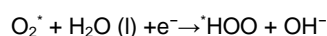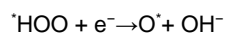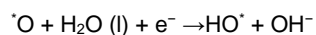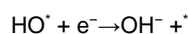

where \* represents the chemisorption site and \*OOH, \*O, \*OH are the reaction oxygen intermediate species.

The reaction free energy ( $\Delta G$ ) of each step is calculated by  $\Delta G = \Delta E + \Delta ZPE - T\Delta S + \Delta GU$

where  $\Delta E$  and  $\Delta ZPE$  represent the adsorption energy of oxygen intermediate species obtained by DFT calculation and the zero-point energy.  $T\Delta S$  is the change in entropy contribution to the free energy,  $U$  is the applied potential. Each step of was obtained as follows:

$$\Delta G_1 = \Delta G_{O_2^*} - eU + \Delta G_{H_2O} - 4.92eV$$

$$\Delta G_2 = \Delta G_{^*HO_2} - \Delta G_{O_2^*} - eU + \Delta G_{H_2O}$$

$$\Delta G_3 = \Delta G_{^*O} - \Delta G_{^*HO_2} - eU + \Delta G_{H_2O}$$

$$\Delta G_4 = -\Delta G_{^*OH} - eU + \Delta G_{H_2O}$$

## 2. Results and Discussion

### 2.1. Additional Supplementary Figures



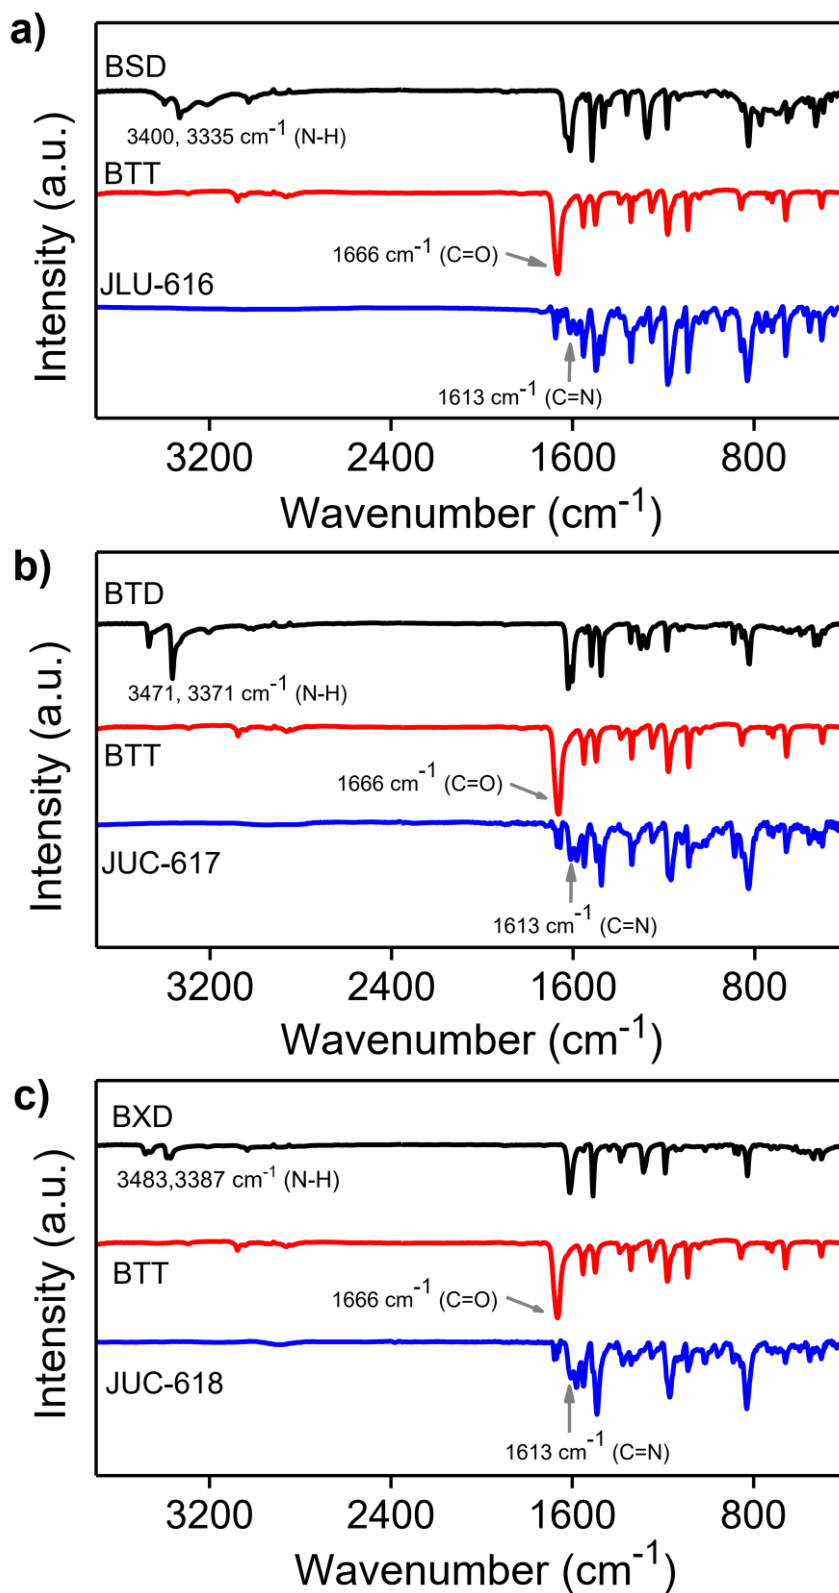

**Figure S1.** (a) FT-IR spectra of JUC-616 and corresponding monomers. (b) FT-IR spectra of JUC-617 and corresponding monomers. (c) FT-IR spectra of JUC-618 and corresponding monomers.

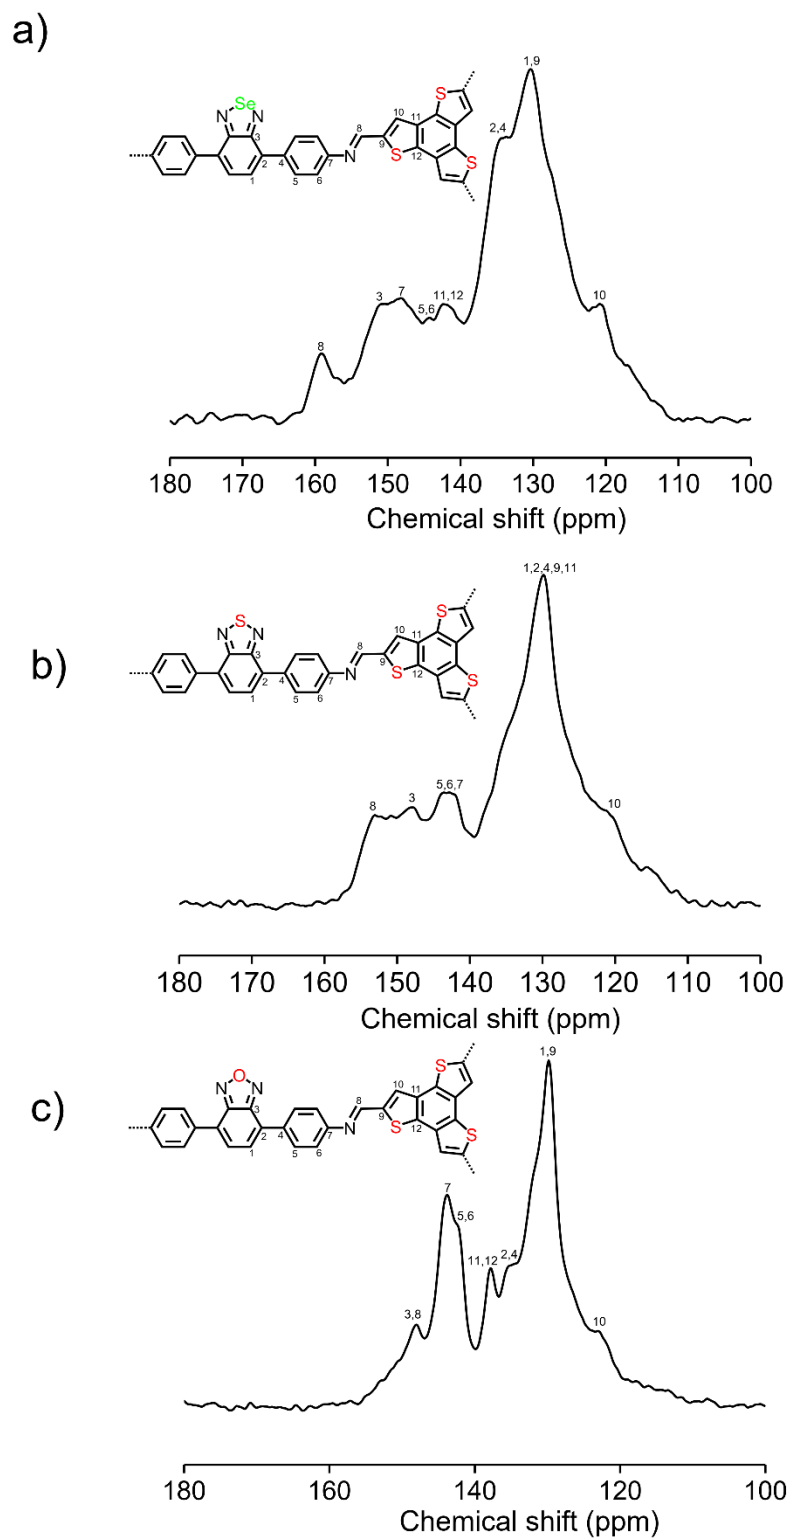

**Figure S2.** Solid state  $^{13}\text{C}$  NMR of JUC-616 (a), JUC-617 (b) and JUC-618 (c).

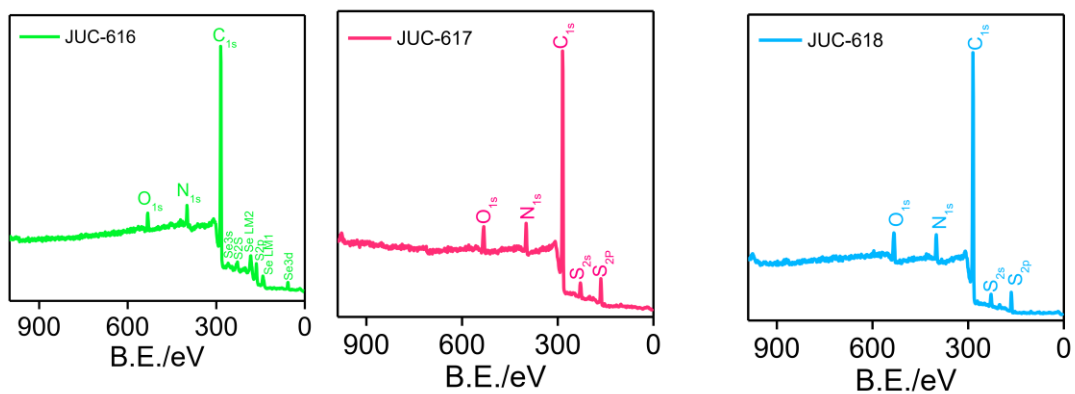

**Figure S3.** XPS survey spectra of JUC-616 (a), JUC-617 (b) and JUC-618 (c).<sup>12, 13</sup>

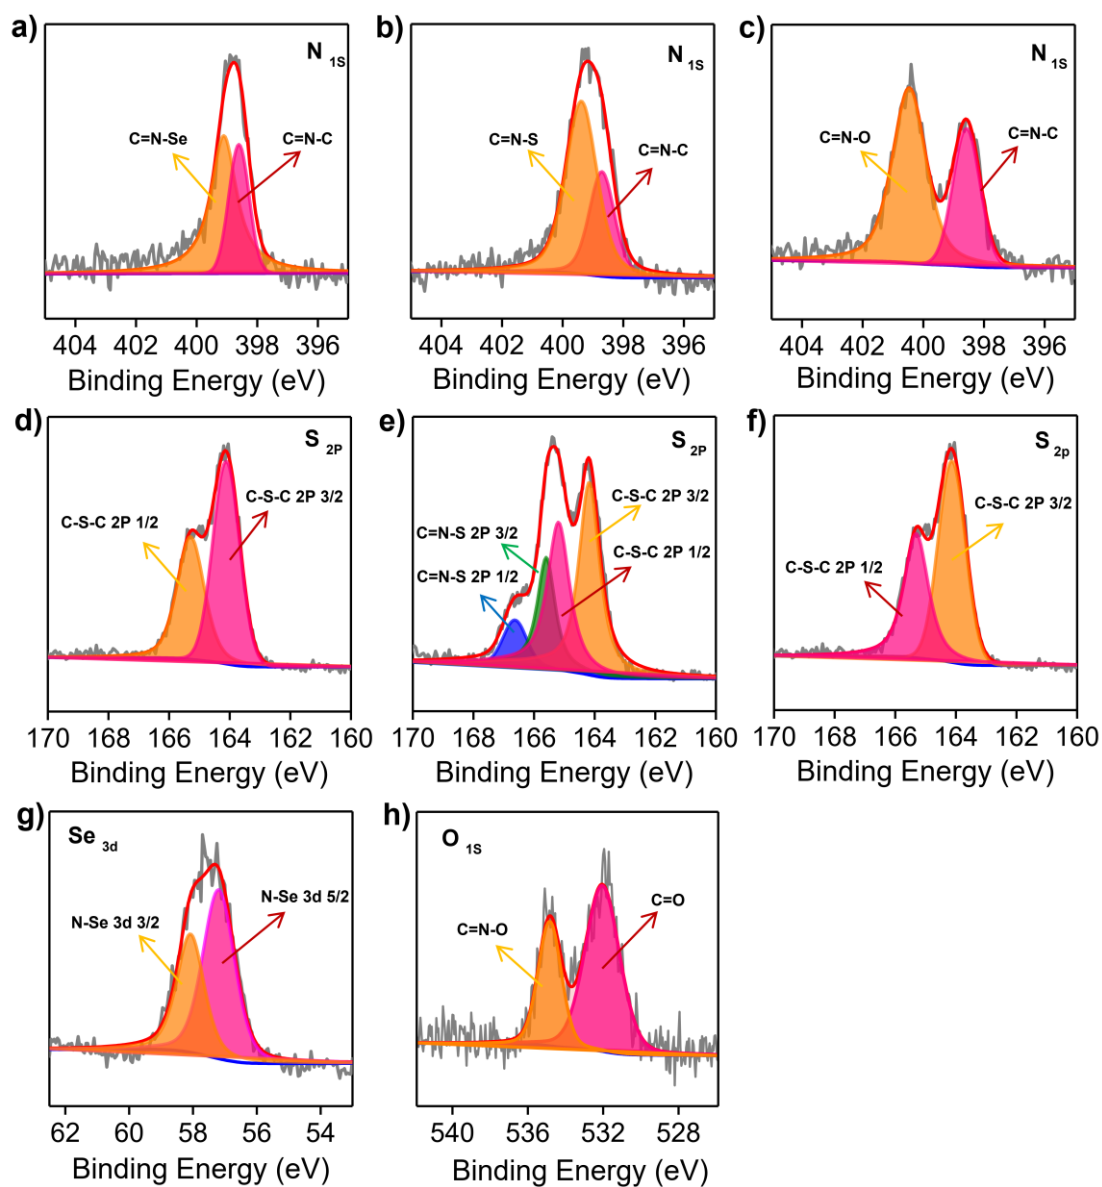

Figure S4. N 1s XPS spectra of JUC-616 (a), JUC-617 (b) and JUC-618 (c). S 2p XPS spectra FT-IR spectra of JUC-616 (d), JUC-617 (e) and JUC-618 (f). Se 3d XPS spectrum of JUC-616 (g). O 1s XPS spectrum of JUC-618 (h).

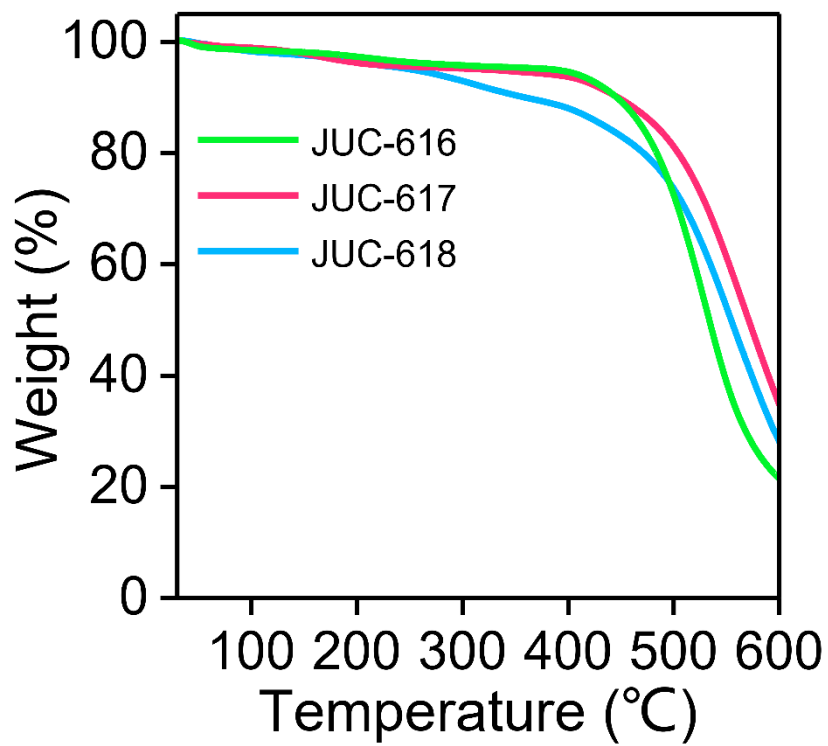

Figure S5. TGA curves of JUC-616 (green), JUC-617 (red) and JUC-618 (blue).

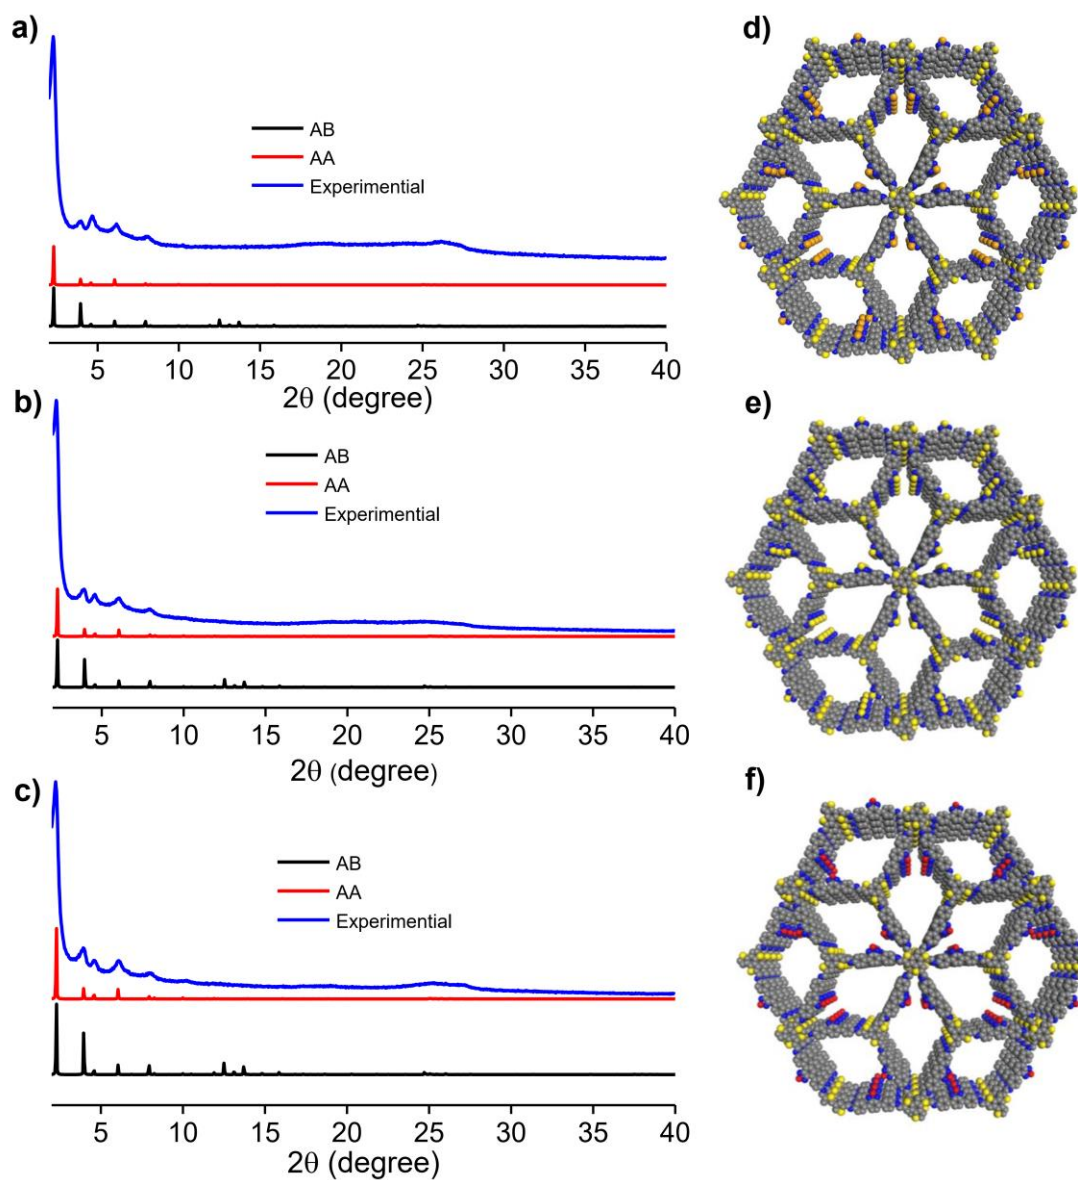

**Figure S6.** XRD profiles of JUC-616 (a), JUC-617 (b) and JUC-618 (c). Experimentally observed (blue line), simulated by using AA-stacking (red line) and AB-stacking (black line) models. Crystal structures of the AB stacking model for JUC-616 (d), JUC-617 (e) and JUC-618 (f).

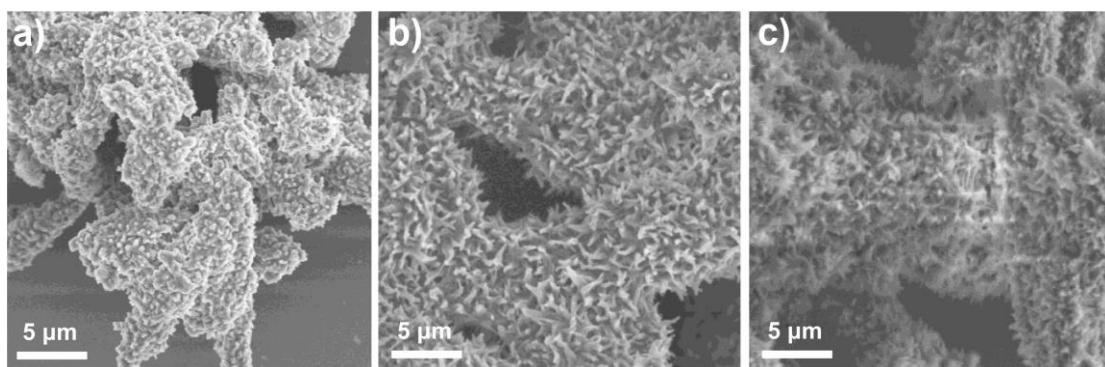

**Figure S7.** FE-SEM images of JUC-616 (a), JUC-617 (b) and JUC-618 (c).

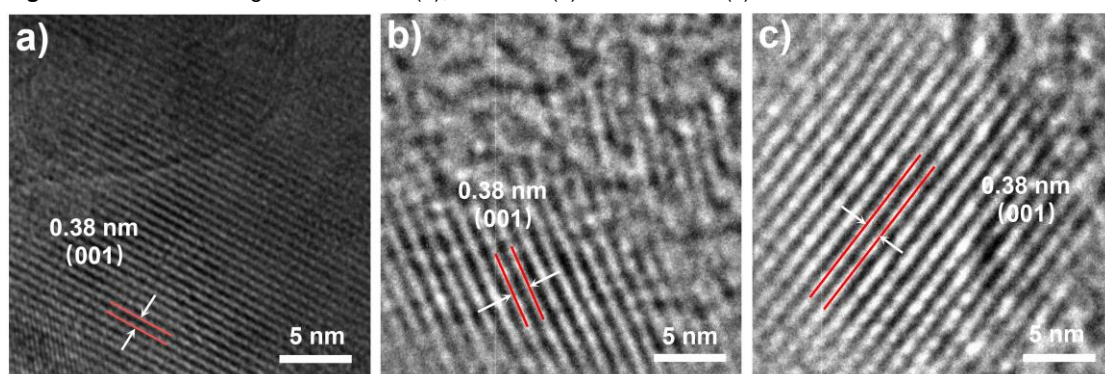

**Figure S8.** HR-TEM images of JUC-616 (a), JUC-617 (b) and JUC-618 (c).

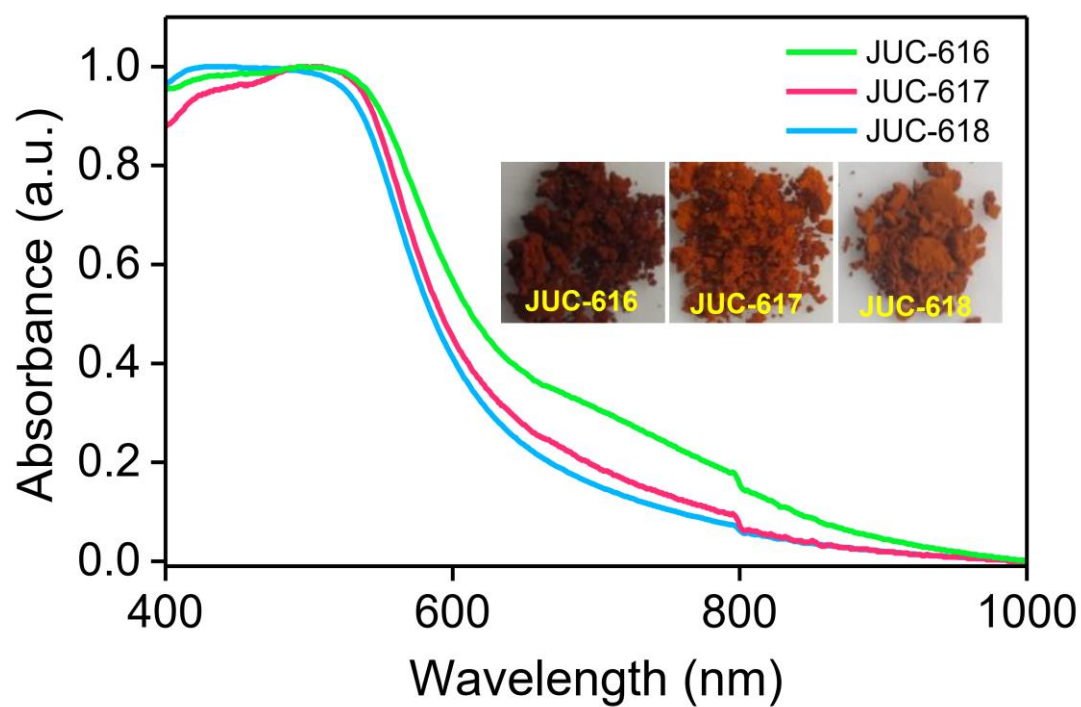

**Figure S9.** UV-Vis diffuse reflectance spectra of JUC-616, JUC-617 and JUC-618. Insets: their optical images.

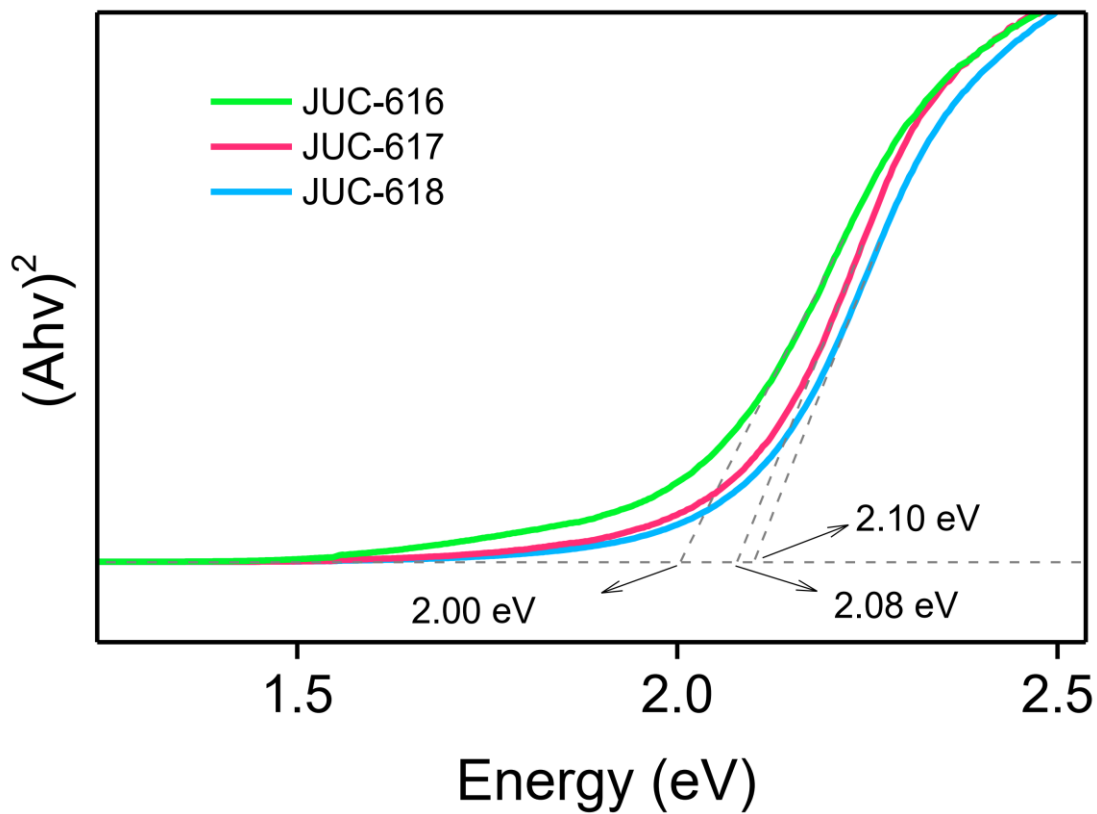

**Figure S10.** Tauc plots of JUC-616, JUC-617 and JUC-618.

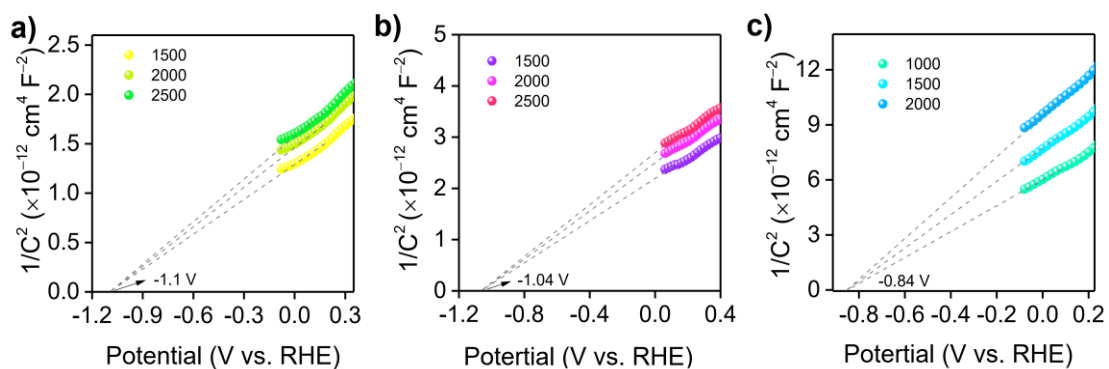

**Figure S11.** Mott-Schottky curves of JUC-616 (a), JUC-617 (b) and JUC-618 (c) in 0.1 M Na<sub>2</sub>SO<sub>4</sub> aqueous solution at three different frequencies.



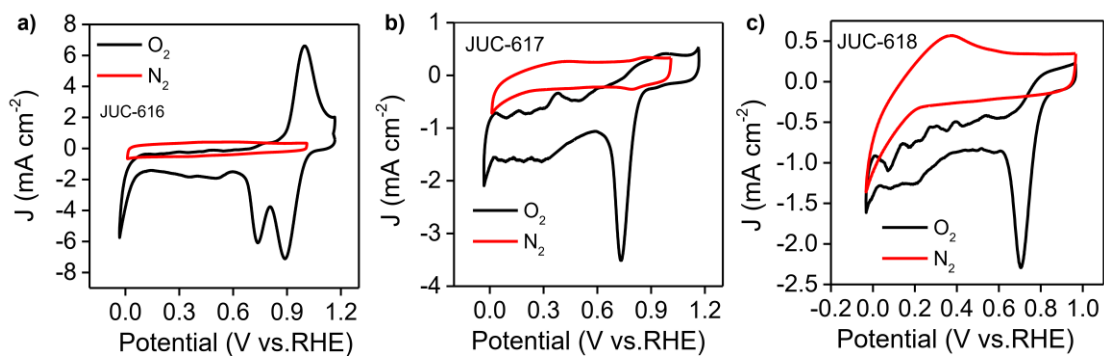

**Figure S12.** Cyclic voltammetric curves of JUC-616 (a), JUC-617 (b) and JUC-618 (c) under  $N_2$  (red line) and  $O_2$  (black line). Note: Under  $O_2$ -saturated conditions, JUC-616 shows a pair of redox peaks near 0.9 V vs. RHE, which corresponds to LSV. Oxygen combines with Se to form  $Se=O$ ,<sup>14</sup> and the larger hybrid orbital and longer bond length of  $Se=O$  results in a weaker  $\pi$  overlap, reducing the  $\pi$ -bonding nature of the  $Se=O$  bond, causing  $Se=O$  to be readily reduced to lower valence Se.<sup>15</sup>

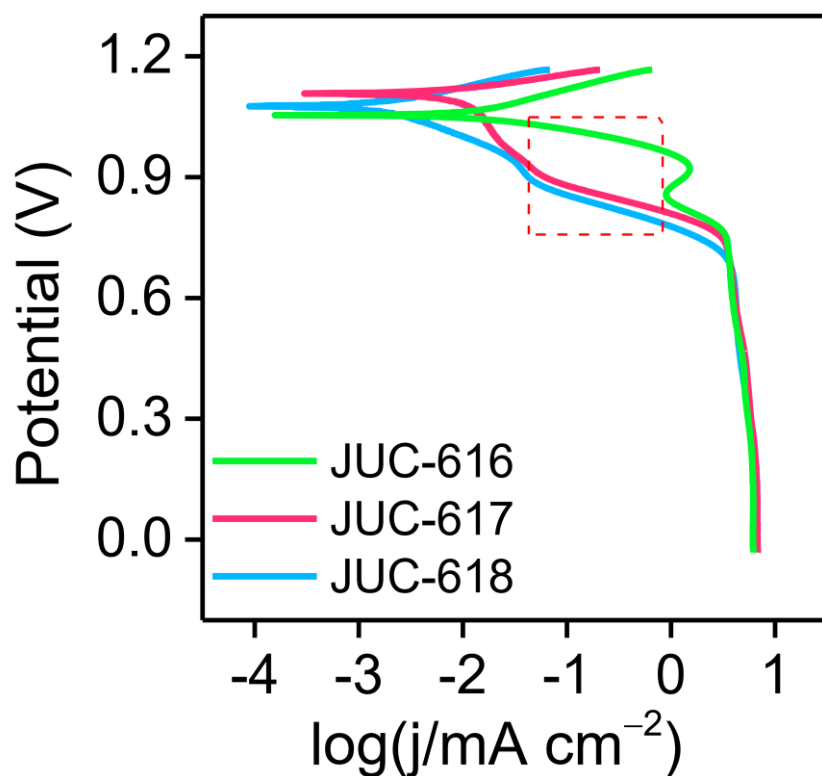

**Figure S13.** The full plot of tafel slope of JUC-616, JUC-617 and JUC-618.

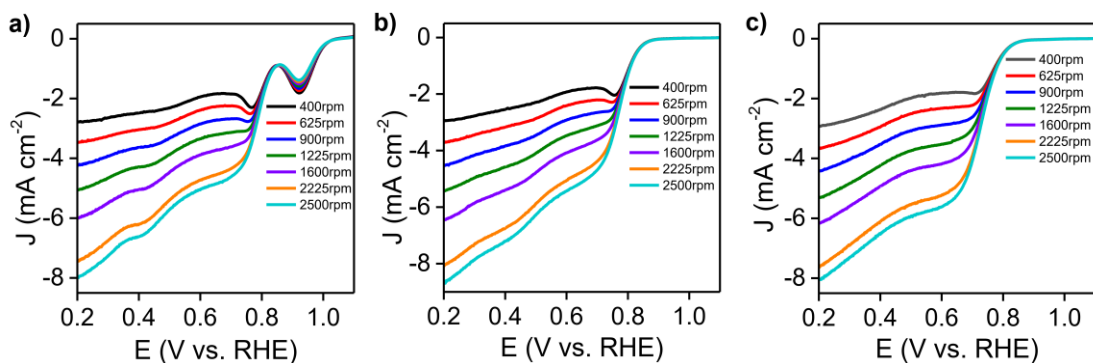

**Figure S14.** LSV curves of JUC-616 (a), JUC-617 (b) and JUC-618 (c) at various rotation speeds.

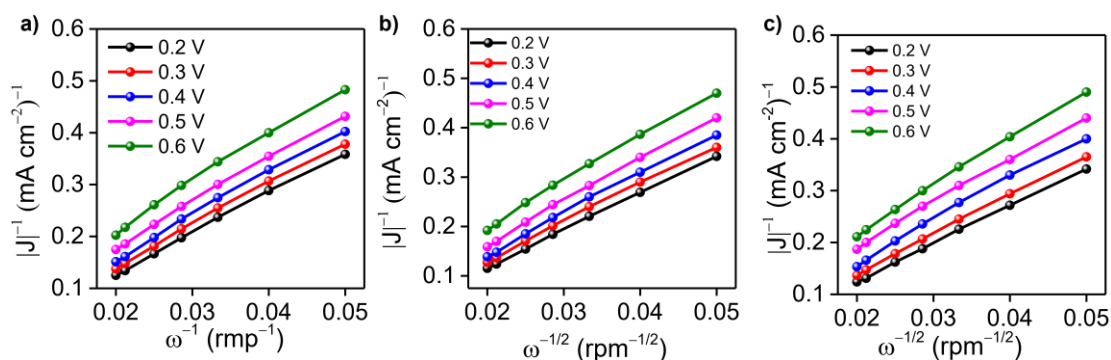

**Figure S15.** The K-L plots for JUC-616 (a), JUC-617 (b), and JUC-618 (c) at 0.2 V–0.6 V (vs RHE).

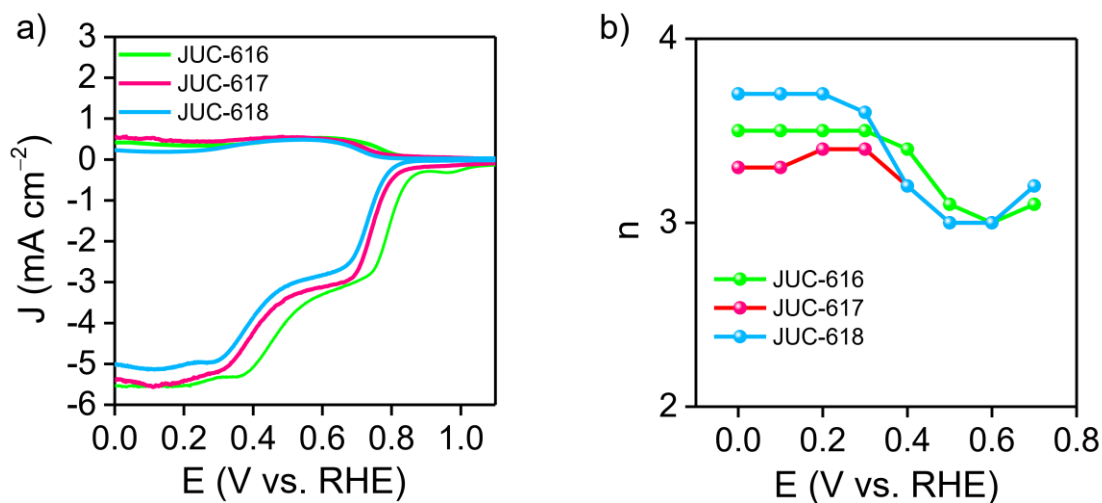

**Figure S16.** RRDE voltammogram (a) and electrons transfer ( $n$ ) (b) of JUC-616, JUC-617 and JUC-618 in  $O_2$  saturated 0.1 M KOH.

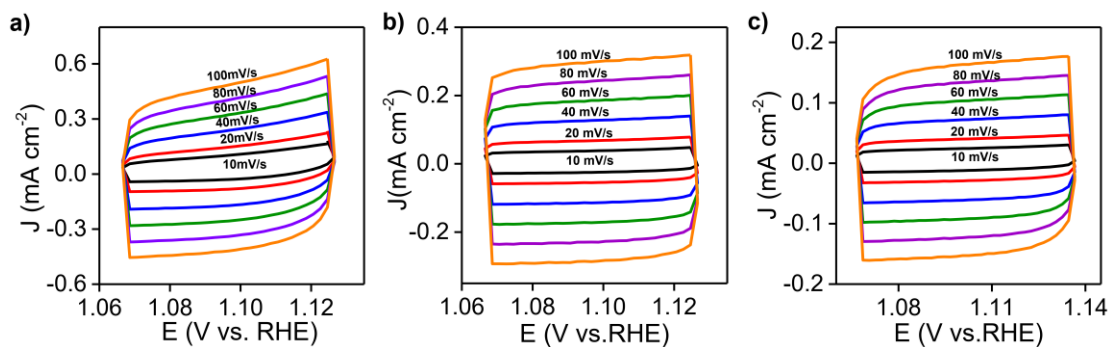

**Figure S17.** Cyclic voltammetric curves of JUC-616 (a), JUC-617 (b) and JUC-618 (c) in 0.1 M KOH solution

at different scan rates (10, 20, 40, 60, 80 and 100  $\text{mV s}^{-1}$ ).

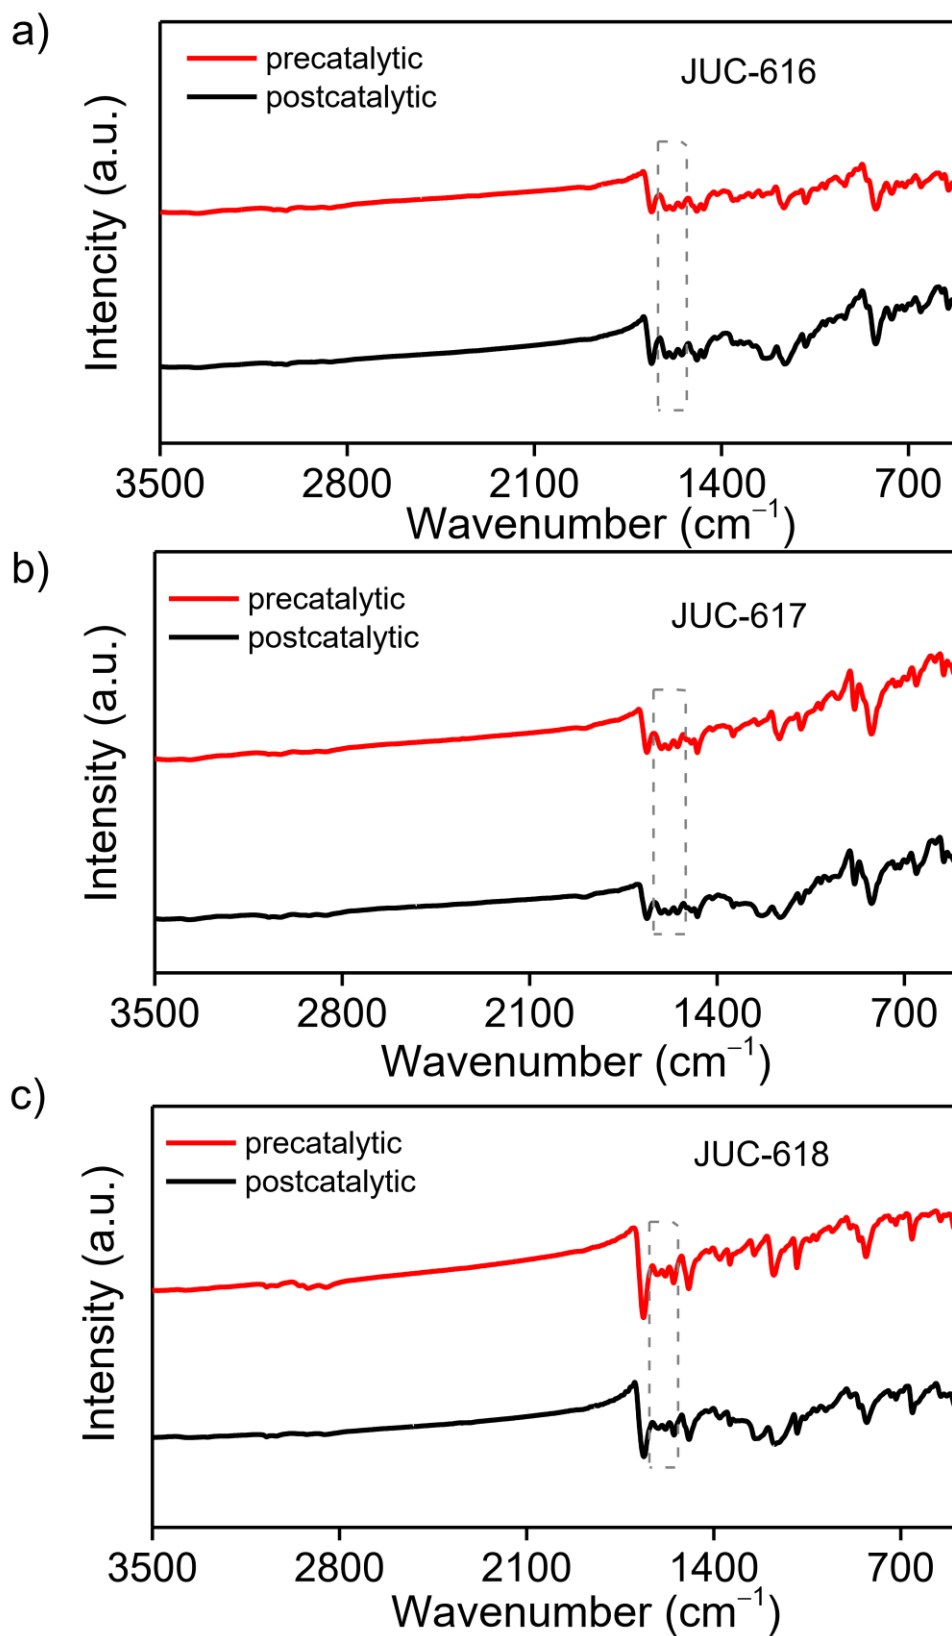

**Figure S18.** FT-IR spectra of JUC-616 (a), JUC-617 (b) and JUC-618 (c) before and after electrocatalysis.

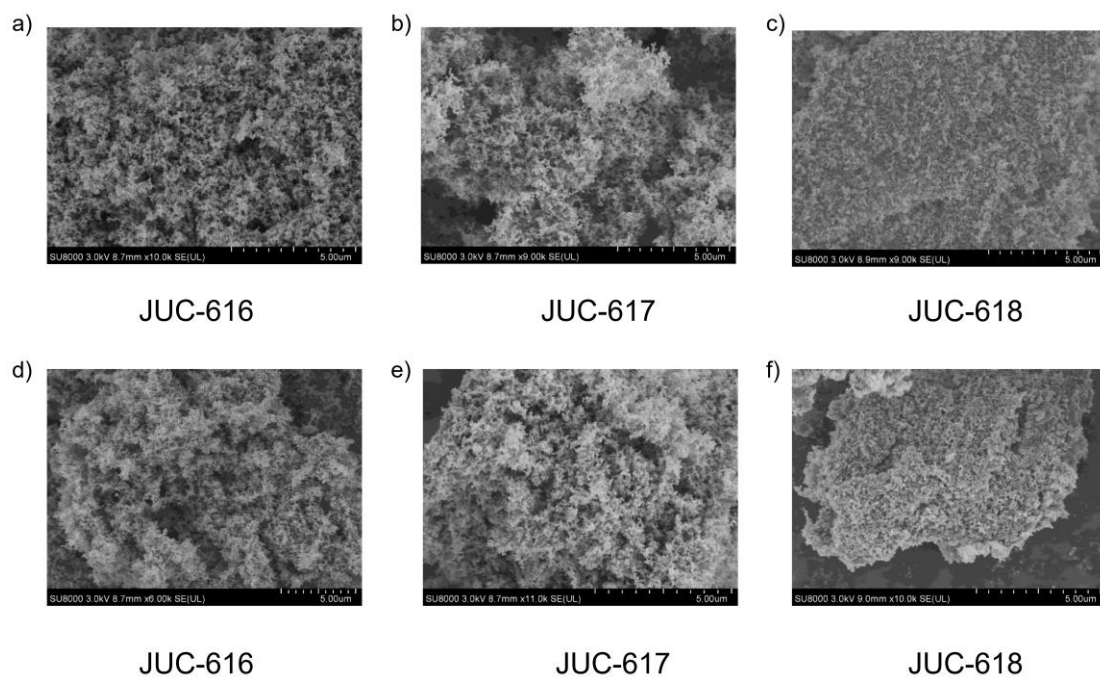

**Figure S19.** FE-SEM images of JUC-616 (a), JUC-617 (b) and JUC-618 (c) before electrocatalysis, and JUC-616 (d), JUC-617 (e) and JUC-618 (f) after electrocatalysis.

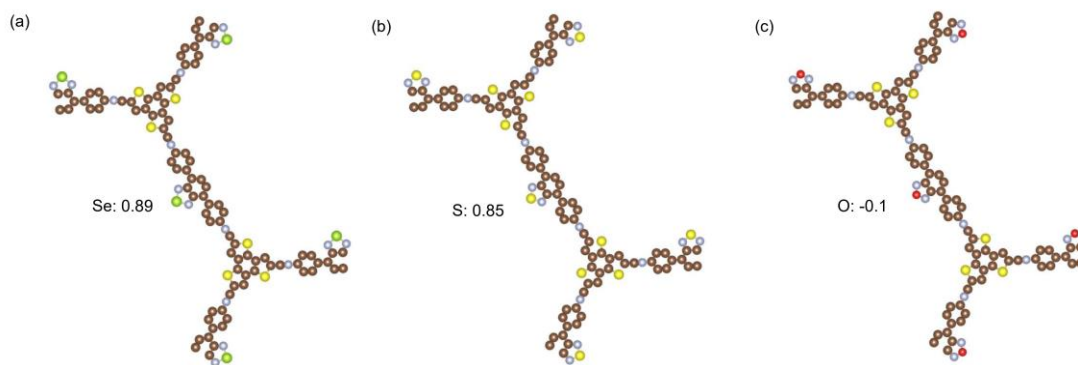

**Figure S20.** The mulliken charge distribution model of JUC-616, JUC-617 and JUC-618.

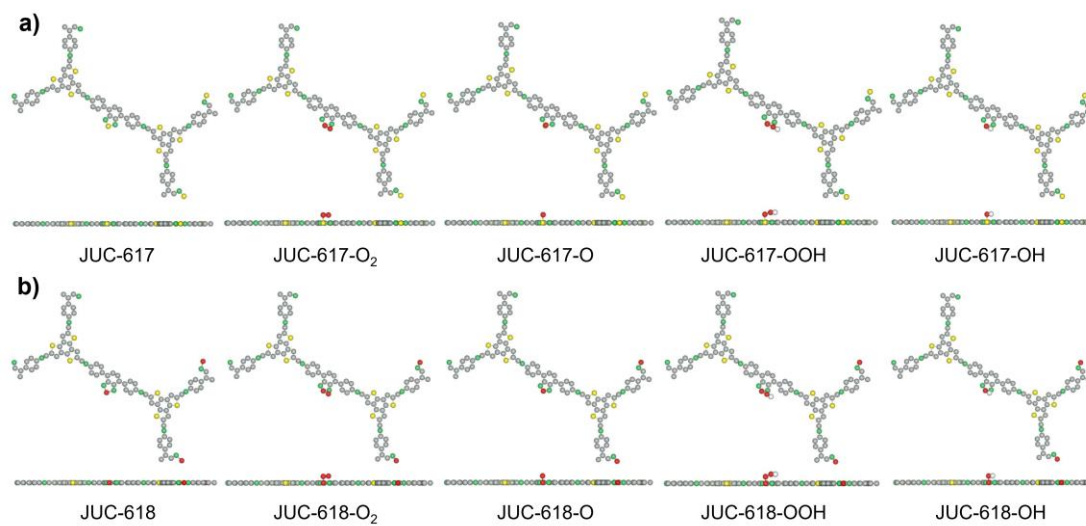

**Figure S21.** Models of the adsorption intermediate state of JUC-617 (a) and JUC-618 (b).

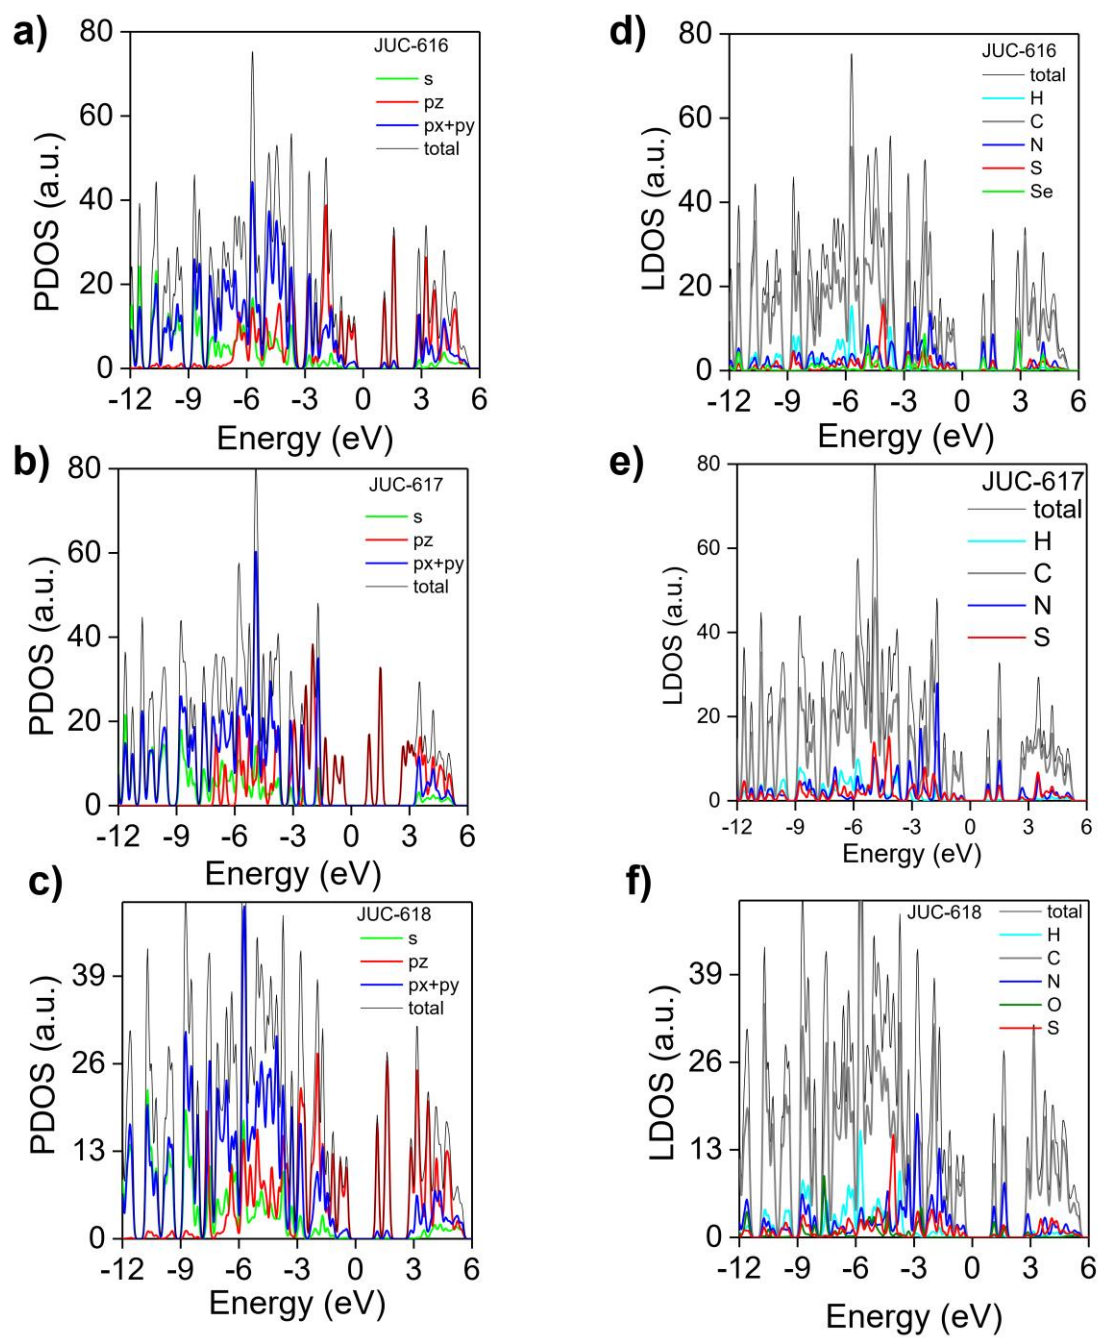

**Figure S22.** Partial density of states for JUC-616 (a), JUC-617 (b) and JUC-618 (c). Local density of states for JUC-616 (d), JUC-617 (e) and JUC-618 (f).

## 2.2. Additional Supplementary Tables

**Table S1.** Unit cell parameters and fractional atomic coordinates for JUC-616.

| Space group               |         | <i>P</i> -6                                                                                                   |     |
|---------------------------|---------|---------------------------------------------------------------------------------------------------------------|-----|
| Observed cell parameters  |         | $a = b = 44.5787 \text{ \AA}$ and $c = 3.5618 \text{ \AA}$<br>$\alpha = \beta = 90^\circ, \gamma = 120^\circ$ |     |
| Simulated cell parameters |         | $a = b = 44.6085 \text{ \AA}$ and $c = 3.5302 \text{ \AA}$<br>$\alpha = \beta = 90^\circ, \gamma = 120^\circ$ |     |
| Agreement factors         |         | $R_{wp} = 3.23\%, R_p = 2.45\%$                                                                               |     |
| atoms                     | x       | y                                                                                                             | z   |
| C1                        | 0.36395 | 0.66286                                                                                                       | 0.5 |
| C2                        | 0.38965 | 0.65458                                                                                                       | 0.5 |
| C3                        | 0.44111 | 0.57281                                                                                                       | 0.5 |
| C4                        | 0.46039 | 0.55594                                                                                                       | 0.5 |
| C5                        | 0.52228 | 0.50739                                                                                                       | 0.5 |
| C6                        | 0.63384 | 0.33306                                                                                                       | 0.5 |
| C7                        | 0.60566 | 0.33758                                                                                                       | 0.5 |
| C8                        | 0.54109 | 0.40734                                                                                                       | 0.5 |
| C9                        | 0.51861 | 0.42064                                                                                                       | 0.5 |
| C10                       | 0.45061 | 0.46579                                                                                                       | 0.5 |
| C11                       | 0.66607 | 0.36586                                                                                                       | 0.5 |
| S12                       | 0.66048 | 0.40090                                                                                                       | 0.5 |
| C13                       | 0.59009 | 0.46554                                                                                                       | 0.5 |
| C14                       | 0.56753 | 0.47875                                                                                                       | 0.5 |
| C15                       | 0.50132 | 0.52249                                                                                                       | 0.5 |
| C16                       | 0.32983 | 0.63223                                                                                                       | 0.5 |
| S17                       | 0.33067 | 0.59451                                                                                                       | 0.5 |
| C18                       | 0.38818 | 0.51744                                                                                                       | 0.5 |
| C19                       | 0.40754 | 0.50065                                                                                                       | 0.5 |
| C20                       | 0.47137 | 0.45083                                                                                                       | 0.5 |
| C21                       | 0.37537 | 0.61891                                                                                                       | 0.5 |
| N22                       | 0.38424 | 0.57001                                                                                                       | 0.5 |
| C23                       | 0.39748 | 0.60332                                                                                                       | 0.5 |
| C24                       | 0.44390 | 0.51958                                                                                                       | 0.5 |
| C25                       | 0.40479 | 0.55356                                                                                                       | 0.5 |
| C26                       | 0.46501 | 0.50210                                                                                                       | 0.5 |
| C27                       | 0.61631 | 0.37259                                                                                                       | 0.5 |
| N28                       | 0.60083 | 0.41705                                                                                                       | 0.5 |
| C29                       | 0.59100 | 0.38436                                                                                                       | 0.5 |
| C30                       | 0.53144 | 0.45652                                                                                                       | 0.5 |
| C31                       | 0.57706 | 0.42981                                                                                                       | 0.5 |
| C32                       | 0.50786 | 0.47124                                                                                                       | 0.5 |
| N33                       | 0.45368 | 0.41601                                                                                                       | 0.5 |
| O34                       | 0.40779 | 0.39901                                                                                                       | 0.5 |
| N35                       | 0.41645 | 0.44283                                                                                                       | 0.5 |
| H36                       | 0.41797 | 0.67599                                                                                                       | 0.5 |
| H37                       | 0.45489 | 0.60231                                                                                                       | 0.5 |
| H38                       | 0.48989 | 0.57167                                                                                                       | 0.5 |
| H39                       | 0.55161 | 0.52502                                                                                                       | 0.5 |
| H40                       | 0.57842 | 0.31409                                                                                                       | 0.5 |
| H41                       | 0.53022 | 0.37812                                                                                                       | 0.5 |
| H42                       | 0.48940 | 0.40229                                                                                                       | 0.5 |
| H43                       | 0.61929 | 0.48395                                                                                                       | 0.5 |
| H44                       | 0.57832 | 0.50795                                                                                                       | 0.5 |
| H45                       | 0.51423 | 0.55195                                                                                                       | 0.5 |
| H46                       | 0.35868 | 0.50164                                                                                                       | 0.5 |
| H47                       | 0.50164 | 0.47115                                                                                                       | 0.5 |
| H48                       | 0.42686 | 0.62056                                                                                                       | 0.5 |
| H49                       | 0.56211 | 0.36464                                                                                                       | 0.5 |

**Table S2.** Unit cell parameters and fractional atomic coordinates for JUC-617.

| Space group               |         | <i>P</i> -6                                                                                                      |     |
|---------------------------|---------|------------------------------------------------------------------------------------------------------------------|-----|
| Observed cell parameters  |         | $a = b = 44.5787 \text{ \AA}$ and $c = 3.5618 \text{ \AA}$<br>$\alpha = \beta = 90^\circ$ , $\gamma = 120^\circ$ |     |
| Simulated cell parameters |         | $a = b = 44.5873 \text{ \AA}$ and $c = 3.5439 \text{ \AA}$<br>$\alpha = \beta = 90^\circ$ , $\gamma = 120^\circ$ |     |
| Agreement factors         |         | $R_{wp} = 3.09\%$ , $R_p = 2.19\%$                                                                               |     |
| atoms                     | x       | y                                                                                                                | z   |
| C1                        | 0.36395 | 0.66286                                                                                                          | 0.5 |
| C2                        | 0.38965 | 0.65458                                                                                                          | 0.5 |
| C3                        | 0.44111 | 0.57281                                                                                                          | 0.5 |
| C4                        | 0.46039 | 0.55594                                                                                                          | 0.5 |
| C5                        | 0.52228 | 0.50739                                                                                                          | 0.5 |
| C6                        | 0.63384 | 0.33306                                                                                                          | 0.5 |
| C7                        | 0.60566 | 0.33758                                                                                                          | 0.5 |
| C8                        | 0.54109 | 0.40734                                                                                                          | 0.5 |
| C9                        | 0.51861 | 0.42064                                                                                                          | 0.5 |
| C10                       | 0.45061 | 0.46579                                                                                                          | 0.5 |
| C11                       | 0.66607 | 0.36586                                                                                                          | 0.5 |
| S12                       | 0.66048 | 0.40090                                                                                                          | 0.5 |
| C13                       | 0.59009 | 0.46554                                                                                                          | 0.5 |
| C14                       | 0.56753 | 0.47875                                                                                                          | 0.5 |
| C15                       | 0.50132 | 0.52249                                                                                                          | 0.5 |
| C16                       | 0.32983 | 0.63223                                                                                                          | 0.5 |
| S17                       | 0.33067 | 0.59451                                                                                                          | 0.5 |
| C18                       | 0.38818 | 0.51744                                                                                                          | 0.5 |
| C19                       | 0.40754 | 0.50065                                                                                                          | 0.5 |
| C20                       | 0.47137 | 0.45083                                                                                                          | 0.5 |
| C21                       | 0.37537 | 0.61891                                                                                                          | 0.5 |
| N22                       | 0.38424 | 0.57001                                                                                                          | 0.5 |
| C23                       | 0.39748 | 0.60332                                                                                                          | 0.5 |
| C24                       | 0.44390 | 0.51958                                                                                                          | 0.5 |
| C25                       | 0.40479 | 0.55356                                                                                                          | 0.5 |
| C26                       | 0.46501 | 0.50210                                                                                                          | 0.5 |
| C27                       | 0.61631 | 0.37259                                                                                                          | 0.5 |
| N28                       | 0.60083 | 0.41705                                                                                                          | 0.5 |
| C29                       | 0.59100 | 0.38436                                                                                                          | 0.5 |
| C30                       | 0.53144 | 0.45652                                                                                                          | 0.5 |
| C31                       | 0.57706 | 0.42981                                                                                                          | 0.5 |
| C32                       | 0.50786 | 0.47124                                                                                                          | 0.5 |
| N33                       | 0.45368 | 0.41601                                                                                                          | 0.5 |
| S34                       | 0.40779 | 0.39901                                                                                                          | 0.5 |
| N35                       | 0.41645 | 0.44283                                                                                                          | 0.5 |
| H36                       | 0.41797 | 0.67599                                                                                                          | 0.5 |
| H37                       | 0.45489 | 0.60231                                                                                                          | 0.5 |
| H38                       | 0.48989 | 0.57167                                                                                                          | 0.5 |
| H39                       | 0.55161 | 0.52502                                                                                                          | 0.5 |
| H40                       | 0.57842 | 0.31409                                                                                                          | 0.5 |
| H41                       | 0.53022 | 0.37812                                                                                                          | 0.5 |
| H42                       | 0.48940 | 0.40229                                                                                                          | 0.5 |
| H43                       | 0.61929 | 0.48395                                                                                                          | 0.5 |
| H44                       | 0.57832 | 0.50795                                                                                                          | 0.5 |
| H45                       | 0.51423 | 0.55195                                                                                                          | 0.5 |
| H46                       | 0.35868 | 0.50164                                                                                                          | 0.5 |
| H47                       | 0.50164 | 0.47115                                                                                                          | 0.5 |
| H48                       | 0.42686 | 0.62056                                                                                                          | 0.5 |
| H49                       | 0.56211 | 0.36464                                                                                                          | 0.5 |



**Table S3.** Unit cell parameters and fractional atomic coordinates for JUC-618.

| Space group               |         | <i>P</i> -6                                                                                                      |     |
|---------------------------|---------|------------------------------------------------------------------------------------------------------------------|-----|
| Observed cell parameters  |         | $a = b = 44.5787 \text{ \AA}$ and $c = 3.5618 \text{ \AA}$<br>$\alpha = \beta = 90^\circ$ , $\gamma = 120^\circ$ |     |
| Simulated cell parameters |         | $a = b = 44.5786 \text{ \AA}$ and $c = 3.5617 \text{ \AA}$<br>$\alpha = \beta = 90^\circ$ , $\gamma = 120^\circ$ |     |
| Agreement factors         |         | $R_{wp} = 1.57\%$ , $R_p = 1.17\%$                                                                               |     |
| atoms                     | x       | y                                                                                                                | z   |
| C1                        | 0.36395 | 0.66286                                                                                                          | 0.5 |
| C2                        | 0.38965 | 0.65458                                                                                                          | 0.5 |
| C3                        | 0.44111 | 0.57281                                                                                                          | 0.5 |
| C4                        | 0.46039 | 0.55594                                                                                                          | 0.5 |
| C5                        | 0.52228 | 0.50739                                                                                                          | 0.5 |
| C6                        | 0.63384 | 0.33306                                                                                                          | 0.5 |
| C7                        | 0.60566 | 0.33758                                                                                                          | 0.5 |
| C8                        | 0.54109 | 0.40734                                                                                                          | 0.5 |
| C9                        | 0.51861 | 0.42064                                                                                                          | 0.5 |
| C10                       | 0.45061 | 0.46579                                                                                                          | 0.5 |
| C11                       | 0.66607 | 0.36586                                                                                                          | 0.5 |
| S12                       | 0.66048 | 0.40090                                                                                                          | 0.5 |
| C13                       | 0.59009 | 0.46554                                                                                                          | 0.5 |
| C14                       | 0.56753 | 0.47875                                                                                                          | 0.5 |
| C15                       | 0.50132 | 0.52249                                                                                                          | 0.5 |
| C16                       | 0.32983 | 0.63223                                                                                                          | 0.5 |
| S17                       | 0.33067 | 0.59451                                                                                                          | 0.5 |
| C18                       | 0.38818 | 0.51744                                                                                                          | 0.5 |
| C19                       | 0.40754 | 0.50065                                                                                                          | 0.5 |
| C20                       | 0.47137 | 0.45083                                                                                                          | 0.5 |
| C21                       | 0.37537 | 0.61891                                                                                                          | 0.5 |
| N22                       | 0.38424 | 0.57001                                                                                                          | 0.5 |
| C23                       | 0.39748 | 0.60332                                                                                                          | 0.5 |
| C24                       | 0.44390 | 0.51958                                                                                                          | 0.5 |
| C25                       | 0.40479 | 0.55356                                                                                                          | 0.5 |
| C26                       | 0.46501 | 0.50210                                                                                                          | 0.5 |
| C27                       | 0.61631 | 0.37259                                                                                                          | 0.5 |
| N28                       | 0.60083 | 0.41705                                                                                                          | 0.5 |
| C29                       | 0.59100 | 0.38436                                                                                                          | 0.5 |
| C30                       | 0.53144 | 0.45652                                                                                                          | 0.5 |
| C31                       | 0.57706 | 0.42981                                                                                                          | 0.5 |
| C32                       | 0.50786 | 0.47124                                                                                                          | 0.5 |
| N33                       | 0.45368 | 0.41601                                                                                                          | 0.5 |
| Se34                      | 0.40779 | 0.39901                                                                                                          | 0.5 |
| N35                       | 0.41645 | 0.44283                                                                                                          | 0.5 |
| H36                       | 0.41797 | 0.67599                                                                                                          | 0.5 |
| H37                       | 0.45489 | 0.60231                                                                                                          | 0.5 |
| H38                       | 0.48989 | 0.57167                                                                                                          | 0.5 |
| H39                       | 0.55161 | 0.52502                                                                                                          | 0.5 |
| H40                       | 0.57842 | 0.31409                                                                                                          | 0.5 |
| H41                       | 0.53022 | 0.37812                                                                                                          | 0.5 |
| H42                       | 0.48940 | 0.40229                                                                                                          | 0.5 |
| H43                       | 0.61929 | 0.48395                                                                                                          | 0.5 |
| H44                       | 0.57832 | 0.50795                                                                                                          | 0.5 |
| H45                       | 0.51423 | 0.55195                                                                                                          | 0.5 |
| H46                       | 0.35868 | 0.50164                                                                                                          | 0.5 |
| H47                       | 0.50164 | 0.47115                                                                                                          | 0.5 |
| H48                       | 0.42686 | 0.62056                                                                                                          | 0.5 |
| H49                       | 0.56211 | 0.36464                                                                                                          | 0.5 |

**Table S4.** Metal-free organic porous materials without pyrolysis of ORR reactions.

| COFs             | $E_{1/2}$ (V) | $J_{lim}$ (mA cm <sup>-2</sup> ) | Tafel        | Cdl         | Ref.                                                      |
|------------------|---------------|----------------------------------|--------------|-------------|-----------------------------------------------------------|
| H-TP-COF         | 0.65          | ~2.5                             | 104          | 2.1         | <i>Chem. Commun.</i> <b>2021</b> , 57, 12619-12622.       |
| JUC-528          | 0.7           | 5                                | 65.9         | 7.6         | <i>J. Am. Chem. Soc.</i> <b>2020</b> , 142, 8104.         |
| TZA-COF          | ~0.75         | 3.5                              | 67.1         | -           | <i>Nanoscale</i> <b>2020</b> , 12, 22718.                 |
| TAPTt            | 0.74          | 6.21                             | 158          | -           | <i>ACS Nano</i> <b>2021</b> , 15, 3309.                   |
| PTCOF            | ~0.7          | ~4.5                             | 124          | -           | <i>Adv. Funct. Mater.</i> <b>2021</b> , 31, 2101727.      |
| TTF-F            | 0.767         | 6.15                             | -            | -           | <i>Adv. Mater.</i> <b>2015</b> , 27, 3190.                |
| TTF-B            | ~0.72         | ~5                               | -            | -           | <i>Adv. Mater.</i> <b>2015</b> , 27, 3190.                |
| PTM-H-COF@C      | 0.62          | 2.5                              | -            | -           | <i>Angew. Chem. Int. Ed.</i> <b>2018</b> , 57, 8007       |
| PTM-CORF@C       | 0.70          | 6                                | -            | -           | <i>Angew. Chem. Int. Ed.</i> <b>2018</b> , 57, 8007       |
| TAPA-NDI-Super P | ~0.71         | 6                                | 76.4         | -           | <i>Appl. Mater. Today</i> <b>2022</b> , 26, 101384        |
| DAPT-TFP-COF/GC  | ~0.67         | ~4.5                             | -            | -           | <i>Nano Res.</i> <b>2022</b> , 15, 3907                   |
| Azo-COF          | 0.68          | 5.43                             | 89           | 1.73        | <i>Angew. Chem. Int. Ed.</i> <b>2022</b> , 61, e202209583 |
| DAF-COF          | 0.74          | ~5                               | 65.1         | 5.78        | <i>Adv. Mater.</i> <b>2023</b> , 35, 2209129              |
| COF-JLU82        | 0.68          | ~5                               | 72.79        | 2.38        | <i>Macromol. Rapid Commun.</i> <b>2022</b> , 2200717      |
| JUC-618          | 0.71          | 6.17                             | 78.96        | 3.12        | This work                                                 |
| JUC-617          | 0.74          | 6.48                             | 75.40        | 5.80        | This work                                                 |
| <b>JUC-616</b>   | <b>0.78</b>   | <b>6.01</b>                      | <b>52.91</b> | <b>8.62</b> | <b>This work</b>                                          |

**Table S5.** Electron transfer number of JUC-616, JUC-617 and JUC-618 at different potentials.

|         | 0.2 V | 0.3 V | 0.4 V | 0.5 V | 0.6 V |
|---------|-------|-------|-------|-------|-------|
| JUC-616 | 3.6   | 3.5   | 3.3   | 3.3   | 3.0   |
| JUC-617 | 3.7   | 3.6   | 3.4   | 3.2   | 3.0   |
| JUC-618 | 3.9   | 3.7   | 3.4   | 3.3   | 3.0   |

**Table S6.** Charge distribution of JUC-616, JUC-617 and JUC-618.

|     | Mulliken Charge |         |         |
|-----|-----------------|---------|---------|
|     | JUC-616         | JUC-617 | JUC-618 |
| C1  | -0.03           | -0.03   | -0.03   |
| C2  | -0.03           | -0.03   | -0.03   |
| C3  | -0.03           | -0.03   | -0.03   |
| C4  | -0.11           | -0.11   | -0.1    |
| C5  | -0.11           | -0.11   | -0.1    |
| C6  | -0.11           | -0.1    | -0.1    |
| C7  | -0.01           | -0.01   | -0.01   |
| C8  | -0.02           | -0.02   | -0.01   |
| C9  | -0.01           | -0.01   | -0.01   |
| C10 | 0.02            | 0.02    | 0.02    |
| C11 | 0.01            | 0.02    | 0.01    |
| C12 | 0.02            | 0.02    | 0.02    |
| C13 | 0.03            | 0.03    | 0.03    |
| C14 | 0.03            | 0.03    | 0.03    |
| C15 | 0.03            | 0.03    | 0.03    |
| C16 | -0.03           | -0.03   | -0.03   |
| C17 | -0.03           | -0.03   | -0.03   |
| C18 | -0.03           | -0.03   | -0.03   |
| C19 | -0.11           | -0.1    | -0.1    |
| C20 | -0.11           | -0.1    | -0.1    |
| C21 | -0.11           | -0.1    | -0.1    |

|     |       |       |       |
|-----|-------|-------|-------|
| C22 | -0.06 | -0.05 | -0.04 |
| C23 | -0.06 | -0.05 | -0.04 |
| C24 | -0.06 | -0.05 | -0.04 |
| C25 | 0.07  | 0.07  | 0.07  |
| C26 | 0.07  | 0.07  | 0.07  |
| C27 | 0.07  | 0.07  | 0.07  |
| C28 | 0.15  | 0.16  | 0.16  |
| C29 | 0.15  | 0.15  | 0.16  |
| C30 | 0.15  | 0.15  | 0.16  |
| C31 | -0.14 | -0.15 | -0.15 |
| C32 | -0.14 | -0.14 | -0.15 |
| C33 | -0.14 | -0.14 | -0.15 |
| C34 | -0.02 | -0.02 | -0.02 |
| C35 | -0.03 | -0.03 | -0.02 |
| C36 | -0.03 | -0.03 | -0.02 |
| C37 | 0.02  | 0.02  | 0.02  |
| C38 | 0.02  | 0.02  | 0.02  |
| C39 | 0.02  | 0.02  | 0.02  |
| C40 | 0.03  | 0.03  | 0.04  |
| C41 | 0.03  | 0.03  | 0.04  |
| C42 | 0.03  | 0.03  | 0.03  |
| C43 | -0.15 | -0.15 | -0.15 |
| C44 | -0.14 | -0.15 | -0.15 |
| C45 | -0.15 | -0.15 | -0.15 |
| C46 | -0.07 | -0.06 | -0.05 |
| C47 | -0.07 | -0.06 | -0.04 |
| C48 | -0.07 | -0.06 | -0.05 |
| C49 | 0.06  | 0.07  | 0.06  |
| C50 | 0.06  | 0.07  | 0.07  |
| C51 | 0.06  | 0.07  | 0.07  |
| C52 | 0.15  | 0.16  | 0.16  |
| C53 | 0.15  | 0.16  | 0.16  |
| C54 | 0.15  | 0.15  | 0.16  |
| C55 | -0.27 | -0.27 | -0.27 |
| C56 | -0.27 | -0.27 | -0.27 |
| C57 | -0.27 | -0.27 | -0.27 |
| C58 | 0.46  | 0.46  | 0.46  |
| C59 | 0.46  | 0.46  | 0.46  |
| C60 | 0.46  | 0.46  | 0.46  |
| C61 | -0.07 | -0.07 | -0.07 |
| C62 | -0.07 | -0.07 | -0.07 |
| C63 | -0.07 | -0.07 | -0.07 |
| C64 | 0.06  | 0.06  | 0.06  |
| C65 | 0.06  | 0.06  | 0.06  |
| C66 | 0.06  | 0.06  | 0.06  |
| C67 | -0.04 | -0.03 | -0.04 |
| C68 | -0.04 | -0.03 | -0.04 |
| C69 | -0.04 | -0.03 | -0.04 |
| C70 | -0.27 | -0.27 | -0.27 |
| C71 | -0.27 | -0.27 | -0.27 |
| C72 | -0.27 | -0.27 | -0.27 |
| C73 | 0.46  | 0.46  | 0.46  |
| C74 | 0.46  | 0.46  | 0.46  |
| C75 | 0.46  | 0.46  | 0.46  |
| C76 | -0.07 | -0.07 | -0.07 |
| C77 | -0.07 | -0.07 | -0.07 |
| C78 | -0.07 | -0.07 | -0.07 |

|     |       |       |       |
|-----|-------|-------|-------|
| C79 | 0.06  | 0.06  | 0.06  |
| C80 | 0.06  | 0.06  | 0.06  |
| C81 | 0.06  | 0.06  | 0.06  |
| C82 | -0.04 | -0.03 | -0.04 |
| C83 | -0.04 | -0.03 | -0.04 |
| C84 | -0.04 | -0.03 | -0.04 |
| N1  | -0.27 | -0.27 | -0.27 |
| N2  | -0.27 | -0.27 | -0.27 |
| N3  | -0.27 | -0.28 | -0.27 |
| N4  | -0.27 | -0.27 | -0.27 |
| N5  | -0.27 | -0.28 | -0.27 |
| N6  | -0.27 | -0.27 | -0.27 |
| N7  | -0.58 | -0.54 | -0.12 |
| N8  | -0.58 | -0.54 | -0.12 |
| N9  | -0.58 | -0.54 | -0.12 |
| N10 | -0.58 | -0.54 | -0.12 |
| N11 | -0.58 | -0.54 | -0.13 |
| N12 | -0.58 | -0.54 | -0.12 |
| S1  | 0.35  | 0.35  | 0.36  |
| S2  | 0.35  | 0.35  | 0.36  |
| S3  | 0.36  | 0.35  | 0.36  |
| S4  | 0.35  | 0.35  | 0.36  |
| S5  | 0.35  | 0.35  | 0.36  |
| S6  | 0.35  | 0.35  | 0.36  |
| O1  |       | -     | -0.09 |
| O2  |       | -     | -0.09 |
| O3  |       | -     | -0.09 |
| S7  | -     | 0.85  | -     |
| S8  | -     | 0.85  | -     |
| S9  | -     | 0.85  | -     |
| Se1 | 0.89  | -     |       |
| Se2 | 0.89  | -     |       |
| Se3 | 0.89  | -     |       |

**Table S7.** The free energy values of JUC-616, JUC-617 and JUC-618.

|               | JUC-616 | JUC-617 | JUC-618 |
|---------------|---------|---------|---------|
| $\Delta G_1$  | -0.4    | -0.18   | -0.37   |
| $\Delta G_2$  | -0.54   | -0.52   | -0.17   |
| $\Delta G_3$  | 0.39    | 0.23    | 0.24    |
| $\Delta G_4$  | 0.55    | 0.47    | 0.3     |
| Overpotential | 0.55    | 0.52    | 0.37    |

### 3. References

- 1 S. Yang, X. Li, Y. Qin, Y. Cheng, W. Fan, X. Lang, L. Zheng and Q. Cao, *ACS Appl. Mater. Inter.*, 2021, **13**, 29471-29481.
- 2 J. Hafner, *J. Comput. Chem.*, 2008, **29**, 2044-2078.
- 3 Z. W. Seh, J. Kibsgaard, C. F. Dickens, I. Chorkendorff, J. K. Nørskov and T. F. Jaramillo, *Science*, 2017, **355**, eaad4998.
- 4 L. Vega, J. Ruvireta, F. Viñes and F. Illas, *J. Chem. Theory Comput.*, 2018, **14**, 395-403.
- 5 A. Dumi, S. Upadhyay, L. Bernasconi, H. Shin, A. Benali and K. D. Jordan, *J. Chem. Phys.*, 2022, **156**, 144702.
- 6 Y. Wang, P. Wisesa, A. Balasubramanian, S. Dwaraknath and T. Mueller, *Comput. Mater. Sci.*, 2021, **187**, 110100.
- 7 P. V. Laurikainen and E. L. Sarlin, *ACS Omega*, 2021, **6**, 29424-29431.
- 8 T. Lu and F. Chen, *J. Comput. Chem.*, 2012, **33**, 580-592.
- 9 G. Kresse and D. Joubert, *Phys. Rev. B.*, 1999, **59**, 1758-1775.
- 10 J. Perdew, K. Burke and M. Ernzerhof, *Phys. Rev. Lett.*, 1997, **78**, 3865-3868.
- 11 J. Greeley, I. E. L. Stephens, A. S. Bondarenko, T. P. Johansson, H. A. Hansen, T. F. Jaramillo, J. Rossmeisl, I. Chorkendorff and J. K. Nørskov, *Nat. Chem.*, 2009, **1**, 552-556.
- 12 J. Feng, S.-h. Luo, S.-x. Yan, Y. Zhan, Q. Wang, Y.-h. Zhang, X. Liu and L.-j. Chang, *Small*, 2021, **17**, 2101887.
- 13 Y. Wang, Y. Lv, Y. Su, L. Chen, H. Li and F. Wu, *Nano Energy*, 2021, **90**, 106589.
- 14 Z. Teng, W. Cai, W. Sim, Q. Zhang, C. Wang, C. Su and T. Ohno, *Appl. Catal. B Environ.*, 2021, **282**, 119589.
- 15 W. Hou and H. Xu, *J. Med. Chem.*, 2022, **65**, 4436-4456.

### 4. Author Contributions

Q. Fang, X. Liu, H. Li, S. Qiu, and V. Valtchev conceived the project, designed experiments and provided funding. J. Li conducted the experiments and analyzed the data. J. Jia, J. Suo, C. Li, Z. Wang provided experimental testing support and gave useful help during the experiments. X. Liu, J. Li and Q. Fang wrote the manuscript and discussed the results with all authors.
